# Supplementary material
Source: PubMed Central journal article supplement (PMC6863354)
Supplement: NIHMS1058226-supplement-All_supplemental.pdf [file NIHMS1058226-supplement-All_supplemental.pdf]

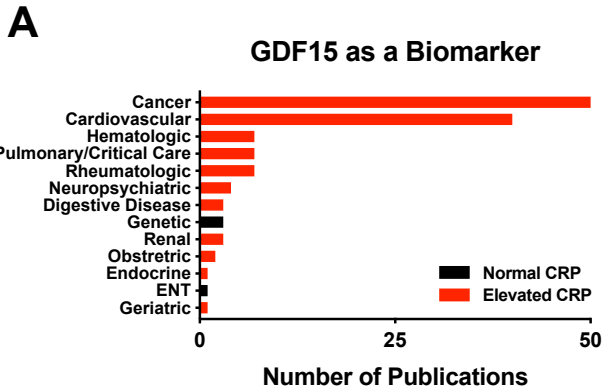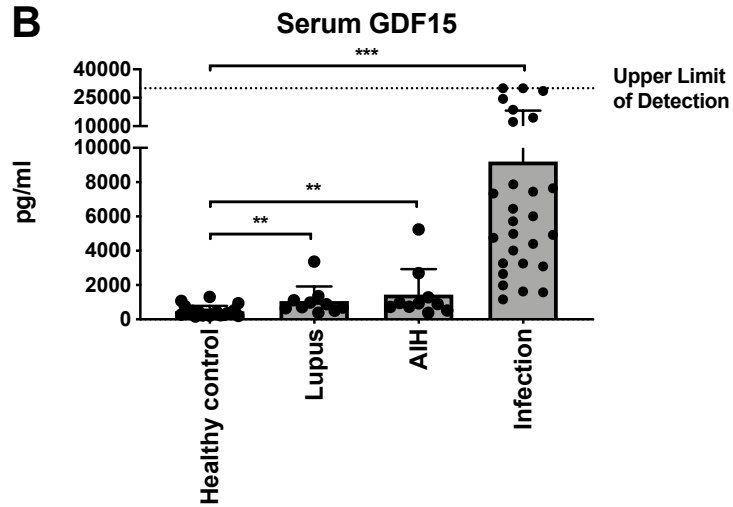

Figure S1

**A**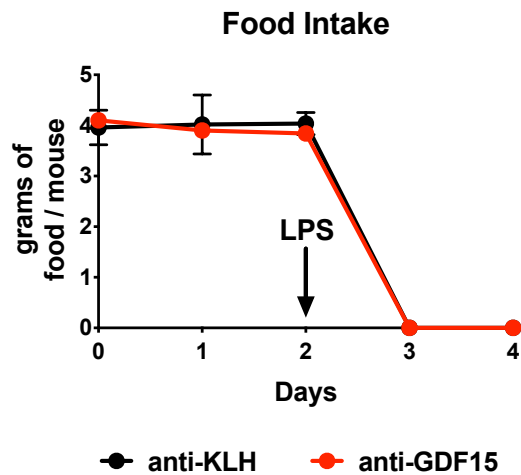**B**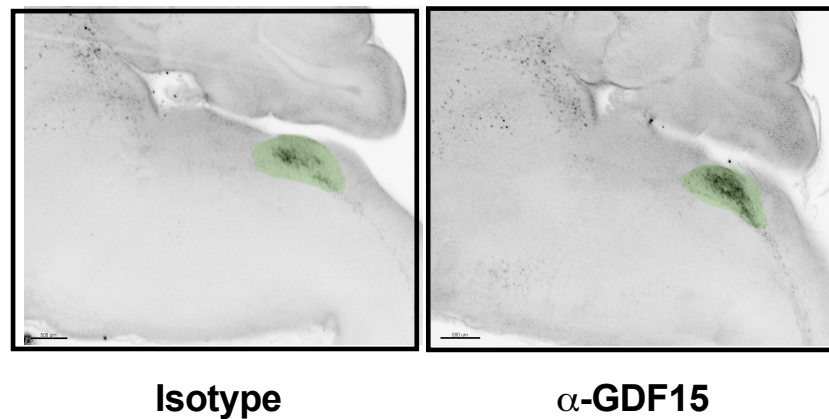**C**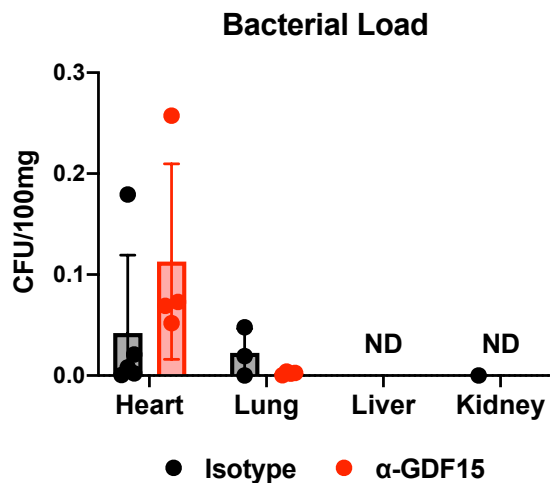

**Nucleus of the Solitary Tract Activation**

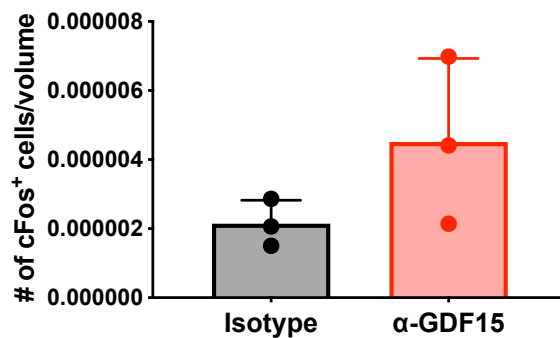**Figure S2**

**A**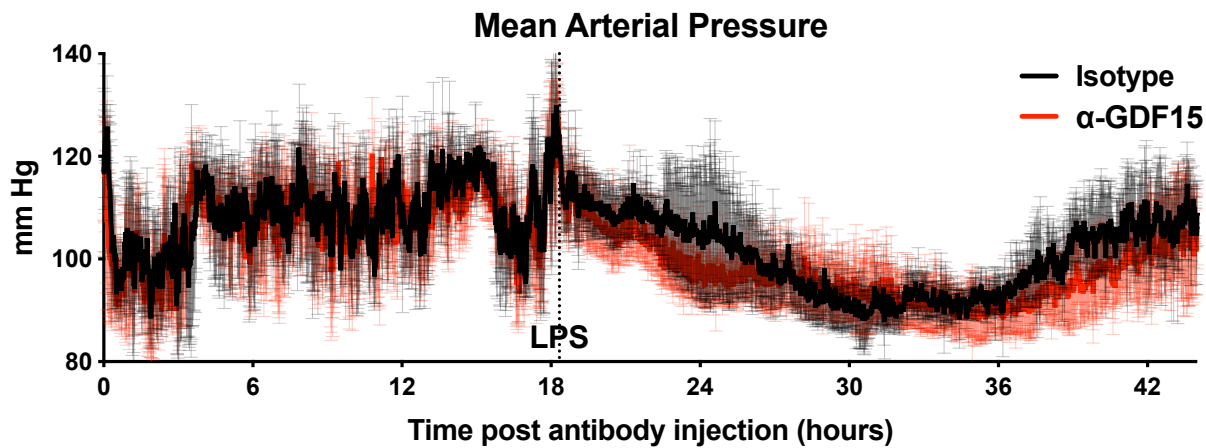**B**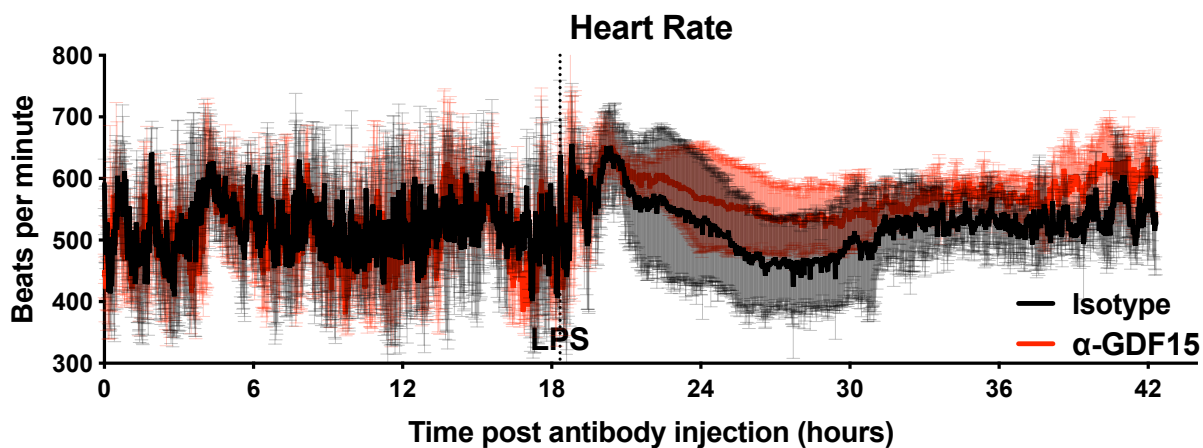**C**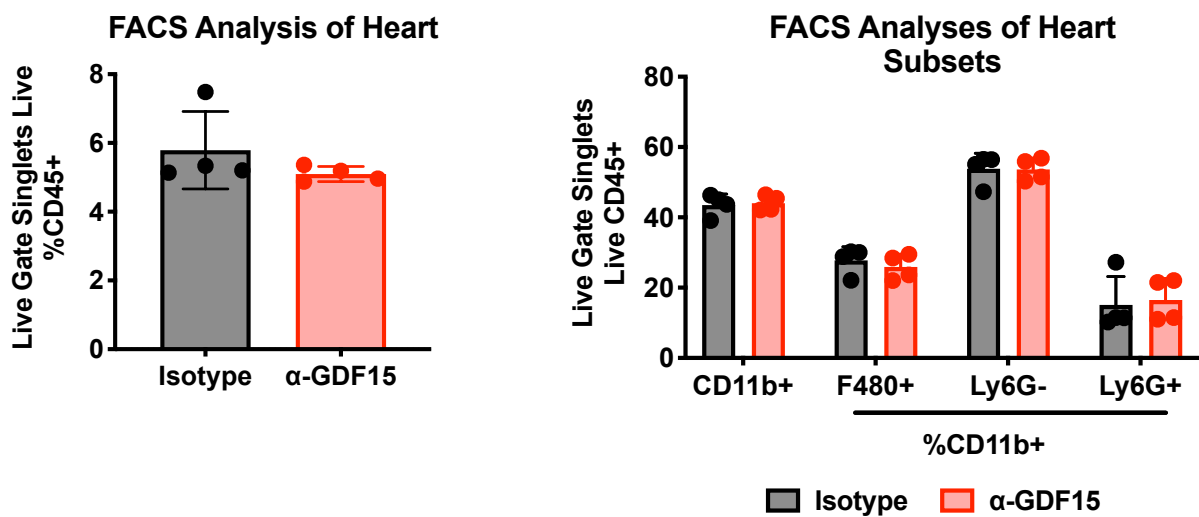**Figure S3**

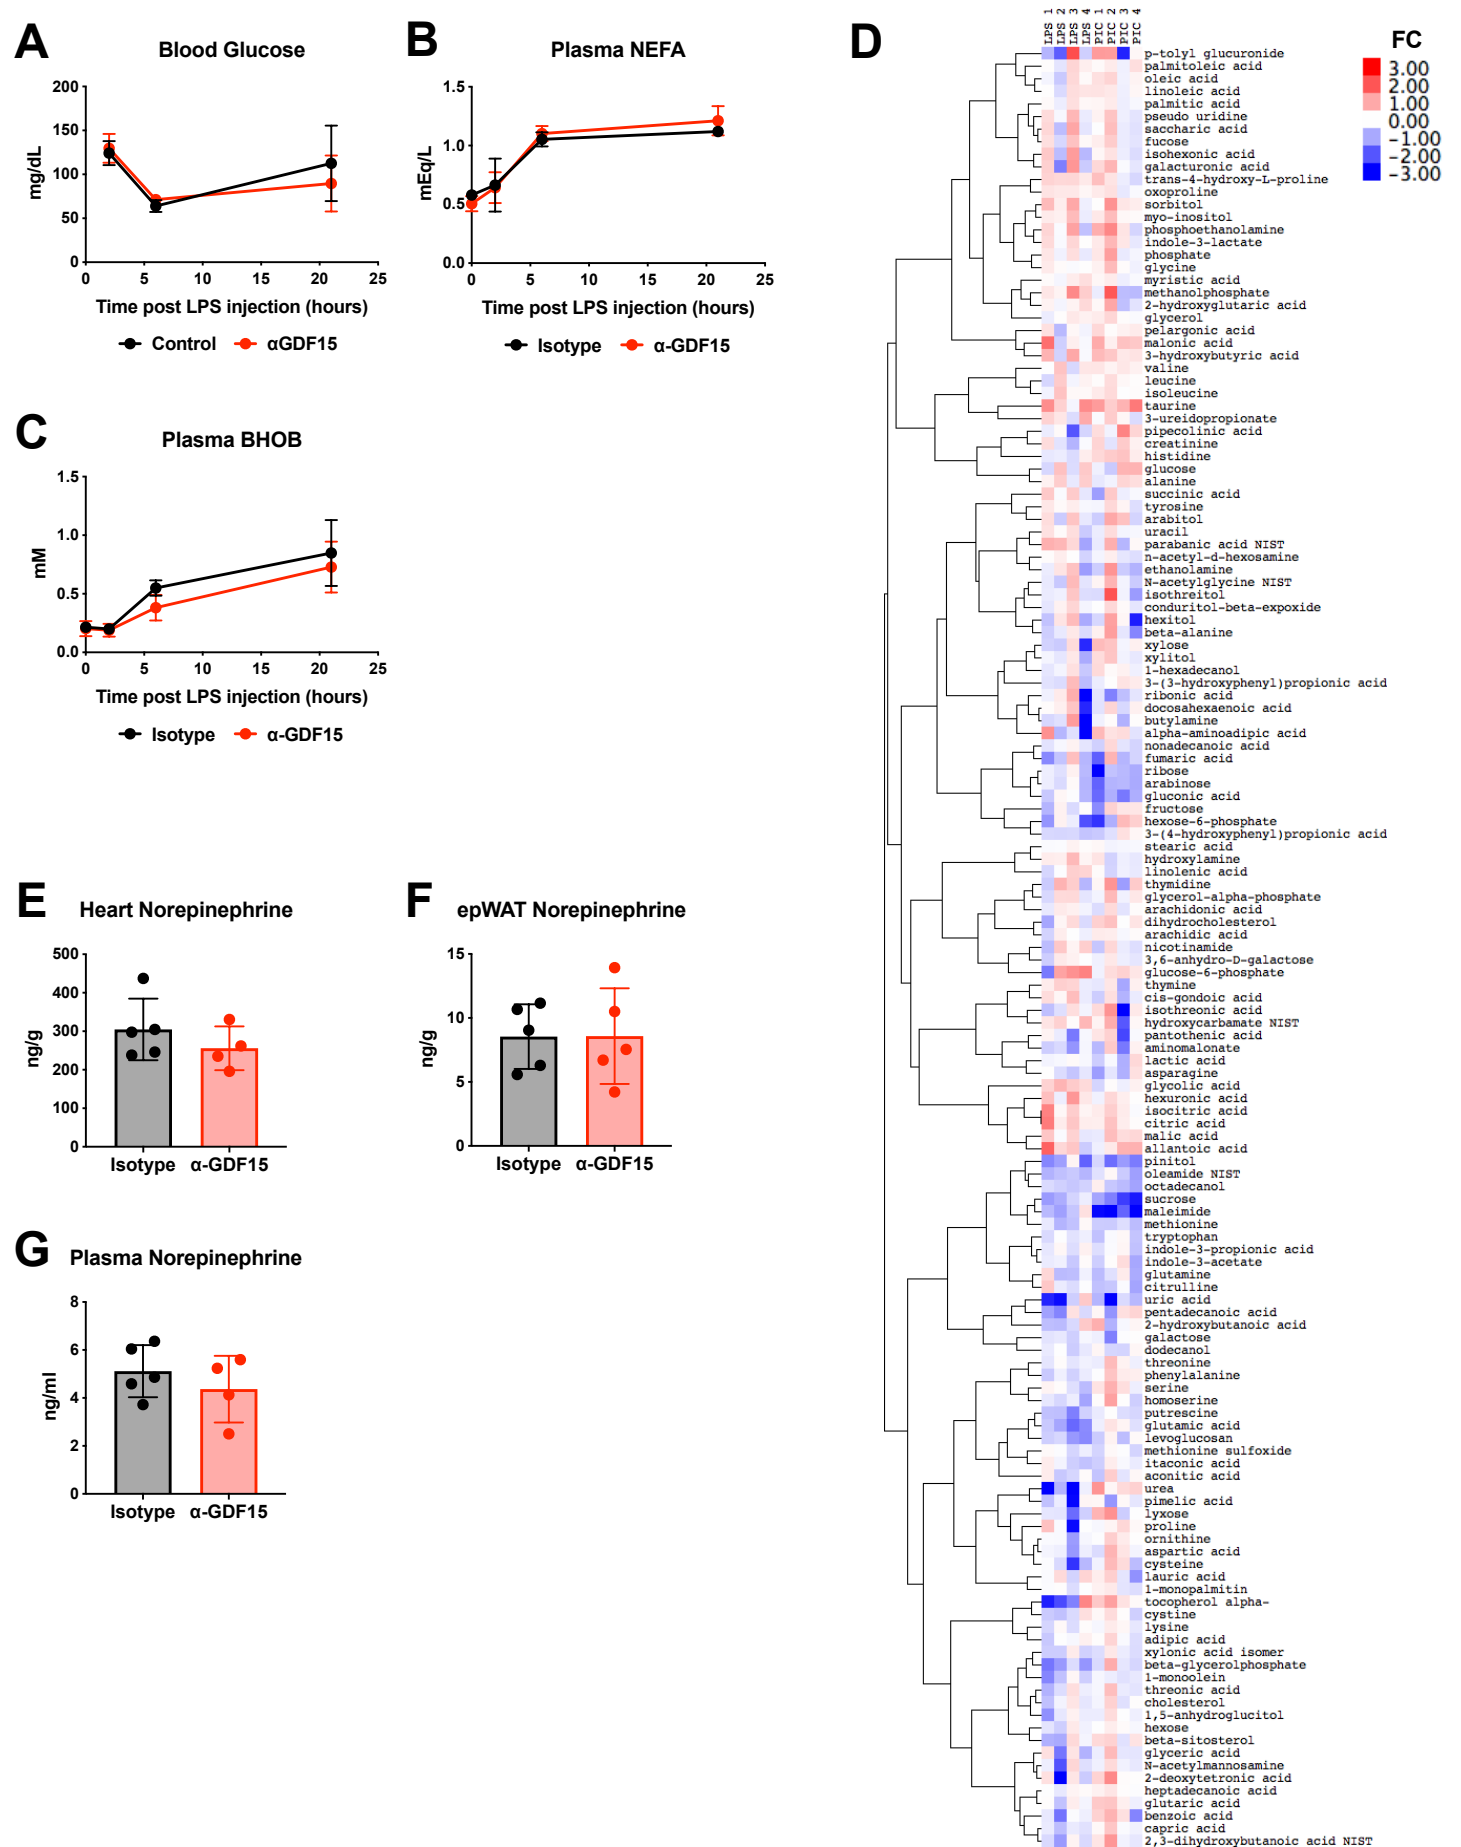

**Figure S4**

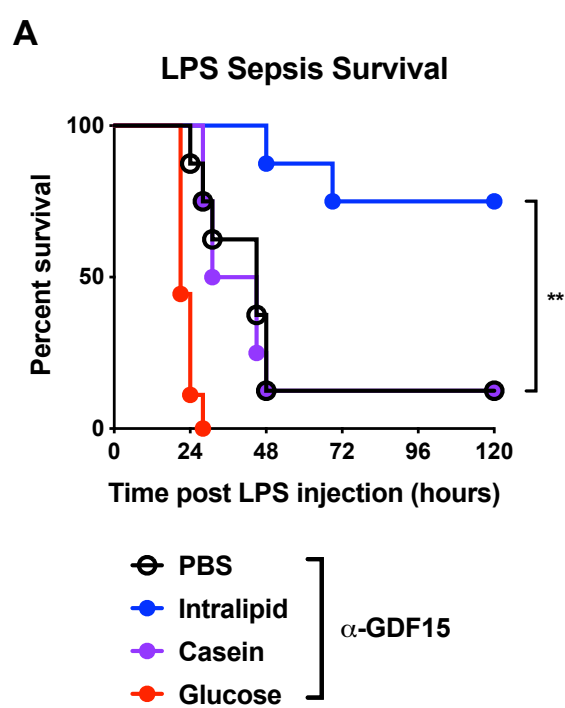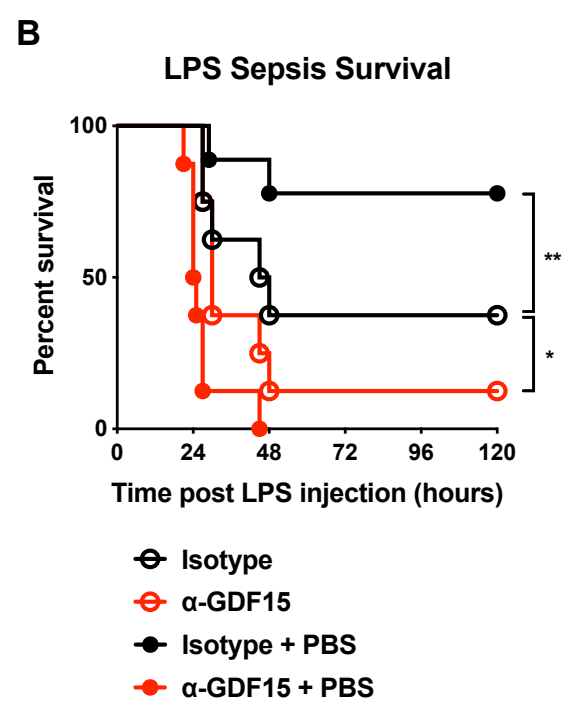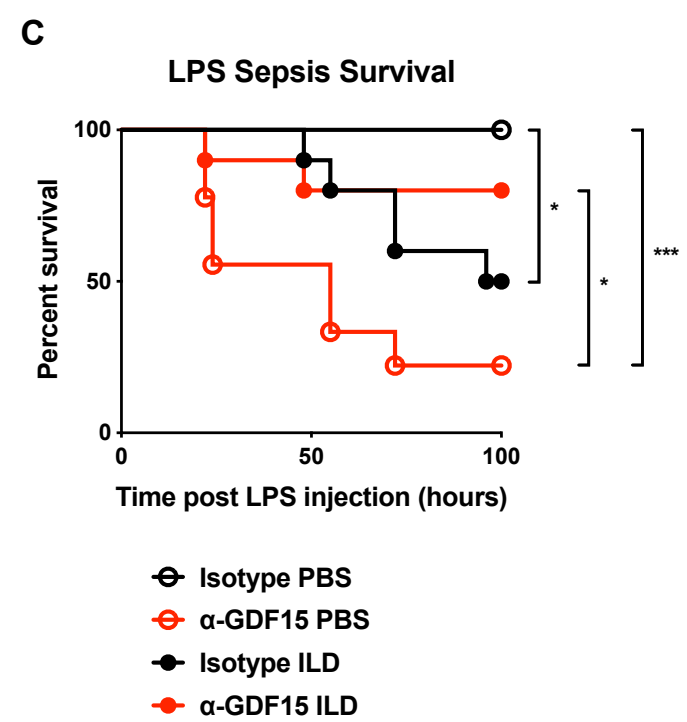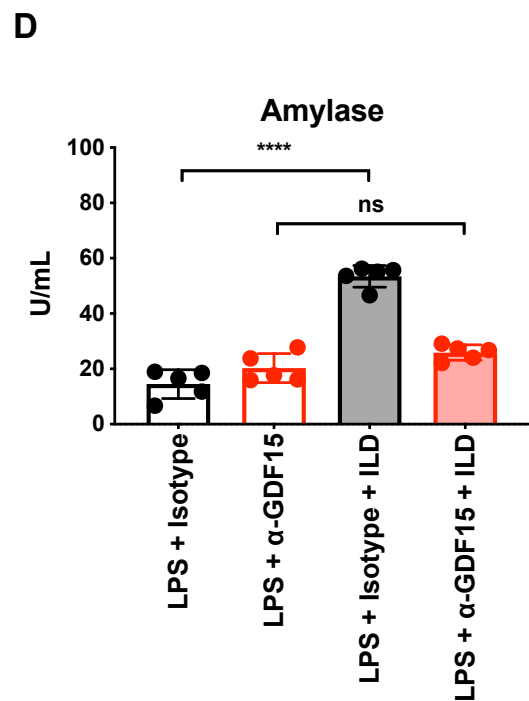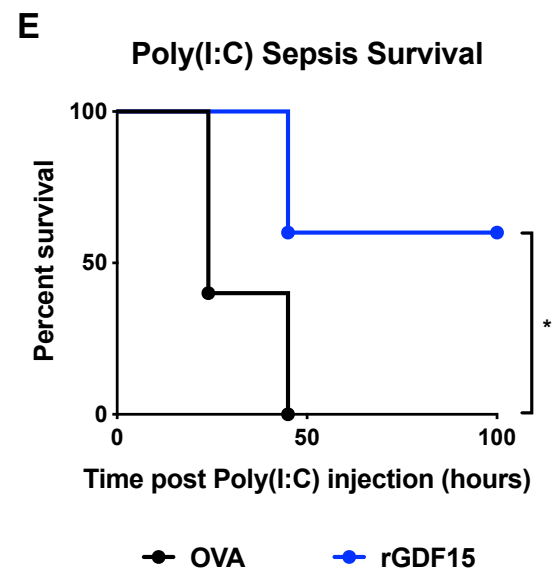

**Figure S5**

**Supplemental Table 1. PMIDs utilized for generating Supplemental Figure 1A**

| Disease Area | Specific Disease                                    | PMID     |
|--------------|-----------------------------------------------------|----------|
| Cancer       | Metastatic castration-resistant prostate cancer     | 28903376 |
| Cancer       | Bone metastases                                     | 28314325 |
| Cancer       | Cancer development in T2D patients                  | 27756762 |
| Cancer       | Melanoma                                            | 27705749 |
| Cancer       | Non-small cell lung cancer                          | 27569226 |
| Cancer       | Bone metastases                                     | 27069189 |
| Cancer       | Colorectal cancer                                   | 26990020 |
| Cancer       | Prostate cancer                                     | 26856686 |
| Cancer       | Epithelial ovarian cancer                           | 26781874 |
| Cancer       | Colorectal cancer                                   | 26026393 |
| Cancer       | Barrett's oesophagus and oesophageal adenocarcinoma | 25867265 |
| Cancer       | Pancreatic ductal adenocarcinoma                    | 25106741 |
| Cancer       | Colorectal cancer                                   | 24565956 |
| Cancer       | Uterine sarcoma                                     | 24401984 |
| Cancer       | Esophageal squamous cell carcinoma                  | 24383865 |
| Cancer       | Pancreatic cancer                                   | 23383312 |
| Cancer       | Oral squamous cell carcinoma                        | 22341306 |
| Cancer       | Adenomatous colonic polyposis                       | 22144502 |
| Cancer       | Metastases in uveal melanoma                        | 21881845 |
| Cancer       | Pancreatic cancer                                   | 21757969 |
| Cancer       | Ovarian cancer                                      | 20576287 |
| Cancer       | Melanoma                                            | 20357814 |
| Cancer       | Prostate cancer                                     | 20215826 |
| Cancer       | Colorectal cancer metastasis                        | 19924834 |
| Cancer       | Glioblastoma                                        | 19521960 |
| Cancer       | HPV cervical cancer                                 | 18398830 |
| Cancer       | Glioblastoma                                        | 18398573 |
| Cancer       | Prostate cancer bone metastases                     | 17372249 |
| Cancer       | Prostate cancer                                     | 16614113 |
| Cancer       | Resectable pancreatic adenocarcinoma                | 16428484 |
| Cancer       | Prostate cancer                                     | 16397079 |
| Cancer       | Pancreatic adenocarcinoma                           | 15073115 |
| Cancer       | Prostate cancer                                     | 12671711 |
| Cancer       | metastatic prostate, breast, and colorectal cancers | 12624183 |
| Cancer       | Prostate cancer                                     | 11507037 |
| Cancer       | Colonic neoplasias                                  | 28569401 |
| Cancer       | Gastric cancer                                      | 28239815 |
| Cancer       | Pancreatic cancer                                   | 29489701 |
| Cancer       | Prostate cancer                                     | 25767870 |
| Cancer       | Osteogenic prostate cancer                          | 25527621 |
| Cancer       | Pancreatic cancer                                   | 25464937 |
| Cancer       | Multiple myeloma                                    | 25052873 |
| Cancer       | Multiple myeloma                                    | 24216602 |

|                |                                                                |          |
|----------------|----------------------------------------------------------------|----------|
| Cancer         | Oral leukoplakia and oral squamous cell carcinoma              | 23710769 |
| Cancer         | Refractory anemia with ring-sideroblasts                       | 19036111 |
| Cancer         | Malignant melanoma                                             | 18754039 |
| Cancer         | Prostate cancer                                                | 17982462 |
| Cancer         | Melanoma                                                       | 15900300 |
| Cancer         | Colorectal carcinoma                                           | 12855642 |
| Cancer         | Cancer cachexia                                                | 26672741 |
| Cardiovascular | Stroke                                                         | 28526273 |
| Cardiovascular | Left ventricular hypertrophy (hypertension associated)         | 29035099 |
| Cardiovascular | Chronic heart failure                                          | 28958347 |
| Cardiovascular | Peripheral artery                                              | 28855167 |
| Cardiovascular | Peripheral artery                                              | 28798540 |
| Cardiovascular | Major bleeding in atrial fibrillation                          | 28760218 |
| Cardiovascular | Acute myocardial infarction                                    | 28683166 |
| Cardiovascular | Major bleeding after acute coronary syndrome                   | 28411246 |
| Cardiovascular | Atherosclerosis progression                                    | 28389123 |
| Cardiovascular | Coronary artery in COPD patients                               | 28245821 |
| Cardiovascular | Cardiovascular                                                 | 28062617 |
| Cardiovascular | Spontaneous MI, CVD mortality                                  | 27932413 |
| Cardiovascular | Heart failure with reduced or preserved EF                     | 27838133 |
| Cardiovascular | Stable coronary heart morbidity and mortality                  | 27811204 |
| Cardiovascular | Acute heart failure                                            | 27788390 |
| Cardiovascular | Cardiovascular in T2D patients                                 | 27510384 |
| Cardiovascular | Cardiovascular in T2D patients                                 | 27456261 |
| Cardiovascular | Cardiovascular events in patients with stable coronary heart   | 27197673 |
| Cardiovascular | Acute coronary mortality and subsequent MI                     | 27154403 |
| Cardiovascular | Coronary artery CVD mortality                                  | 27056183 |
| Cardiovascular | Coronary artery                                                | 26996787 |
| Cardiovascular | Heart failure with reduced or preserved EF                     | 26497848 |
| Cardiovascular | Major bleeding, spontaneous MI, stroke, CV events in acute cor | 26417057 |
| Cardiovascular | Cardiogenic shock                                              | 24903195 |
| Cardiovascular | MI mortality                                                   | 24521768 |
| Cardiovascular | Acute ischemic stroke                                          | 22231869 |
| Cardiovascular | Tako-Tsubo cardiomyopathy                                      | 22119264 |
| Cardiovascular | Acute coronary syndrome prognosis                              | 20966402 |
| Cardiovascular | MI prognosis                                                   | 17977844 |
| Cardiovascular | Chronic heart failure                                          | 17825714 |
| Cardiovascular | Acute coronary syndrome prognosis                              | 17283261 |
| Cardiovascular | takotsubo cardiomyopathy                                       | 24681016 |
| Cardiovascular | Left ventricular hypertrophy                                   | 24200688 |
| Cardiovascular | Acute coronary syndrome                                        | 23818444 |
| Cardiovascular | Left ventricular hypertrophy (hypertension associated)         | 23071585 |
| Cardiovascular | MI                                                             | 21516086 |
| Cardiovascular | Acute coronary syndrome prognosis                              | 17848615 |
| Cardiovascular | Cardiovascular events                                          | 12090982 |

|                    |                                                                |          |
|--------------------|----------------------------------------------------------------|----------|
| Cardiovascular     | Pulmonary arterial hypertension                                | 21548946 |
| Cardiovascular     | Cardiovascular events in patients with mild to moderate corona | 22688311 |
| Endocrinology      | Impaired fasting glucose                                       | 25541611 |
| ENT                | Nasal polyps                                                   | 26795264 |
| Gastrointestinal   | Chronic hepatitis, compensated liver cirrhosis, decompensated  | 27728964 |
| Gastrointestinal   | Liver cirrhosis and hepatocellular carcinoma                   | 25996938 |
| Gastrointestinal   | Advanced fibrosis in NAFLD                                     | 28898507 |
| Genetics           | Mitochondrial                                                  | 26867126 |
| Genetics           | Erythropoietic protoporphyria                                  | 28185024 |
| Genetics           | Mitochondrial                                                  | 25446397 |
| Geriatrics         | Aging                                                          | 29955888 |
| Hematologic        | Anaemia of chronic , mixed type anaemia (ACD/IDA)              | 19863534 |
| Hematologic        | Sickle cell                                                    | 25065856 |
| Hematologic        | B-thalassemia                                                  | 24867648 |
| Hematologic        | Thalassemia                                                    | 17721544 |
| Hematologic        | Anemia of unknown etiology                                     | 21535154 |
| Hematologic        | Pulmonary embolism                                             | 18263797 |
| Hematologic        | Congenital dyserythropoietic anemia                            | 18824595 |
| Neuropsychiatric   | Parkinson                                                      | 28787735 |
| Neuropsychiatric   | Cognitive impairment, no dementia                              | 27537582 |
| Neuropsychiatric   | Parkinson's                                                    | 26938614 |
| Neuropsychiatric   | Psychosis                                                      | 28801589 |
| Obstetrics         | Hyperemesis gravidarum                                         | 29563502 |
| Obstetrics         | Pregnancy                                                      | 11134143 |
| Pulmonary/Critical | Acute cholera infection                                        | 17307946 |
| Pulmonary/Critical | Acute exacerbation of COPD                                     | 26243260 |
| Pulmonary/Critical | Acute exacerbation of COPD                                     | 25820390 |
| Pulmonary/Critical | COPD exacerbation and mortality                                | 28298399 |
| Pulmonary/Critical | Idiopathic pulmonary arterial hypertension                     | 18565955 |
| Pulmonary/Critical | Multiple inflammatory (HF, pneumonia, COPD, renal , sepsis)    | 25850080 |
| Pulmonary/Critical | ICU-acquired weakness                                          | 25516419 |
| Renal              | Diabetic nephropathy                                           | 28341782 |
| Renal              | CKD progression                                                | 28159780 |
| Renal              | CKD mortality                                                  | 21940482 |
| Rheumatic          | Systemic scleroderma                                           | 28872977 |
| Rheumatic          | Rheumatoid arthritis                                           | 17328047 |
| Rheumatic          | Rheumatoid arthritis                                           | 27679935 |
| Rheumatic          | Behcet's                                                       | 27206990 |
| Rheumatologic      | Temperomandibular joint osteoarthritis                         | 25278075 |
| Rheumatologic      | Osteoarthritis                                                 | 19011694 |
| Rheumatologic      | Systemic lupus erythmatosus                                    | 27211902 |



**Supplemental Table 2. Patient characteristics, Related to Figure 1 and Supplemental Figure 1**

**Lupus sample**

| AGE | GENDER |
|-----|--------|
| 61  | M      |
| 50  | F      |
| 60  | F      |
| 44  | M      |
| 49  | M      |
| 40  | F      |
| 38  | F      |
| 26  | F      |
| 41  | F      |
| 54  | F      |

**Autoimmune Hepatitis**

| AGE | GENDER |
|-----|--------|
| 59  | F      |
| 66  | F      |
| 61  | F      |
| 55  | F      |
| 50  | F      |
| 81  | F      |
| 67  | F      |
| 71  | F      |
| 54  | F      |
| 60  | M      |

**Healthy Control**

| AGE | GENDER |
|-----|--------|
| 43  | F      |
| 53  | F      |
| 41  | F      |
| 35  | M      |
| 52  | F      |
| 39  | F      |
| 40  | F      |
| 25  | F      |
| 47  | F      |
| 54  | F      |
| 50  | F      |
| 36  | M      |
| 29  | F      |
| 33  | M      |
| 27  | M      |
| 23  | F      |
| 69  | F      |
| 79  | F      |
| 75  | M      |
| 65  | M      |
| 76  | F      |

**Septic Shock/Severe Sepsis**

| AGE | GENDER | PATHOGEN     | SOURCE      |
|-----|--------|--------------|-------------|
| 52  | M      | Citrobacter  | Sputum      |
| 55  | F      | E Coli       | Blood/Urine |
| 57  | M      | MRSA/C Diff  | Blood/Stool |
| 50  | M      | Proteus/VRE  | Blood/Blood |
| 52  | M      | Klebs        | Blood/Urine |
| 63  | M      | Morexella    | Sputum      |
| 53  | M      | PsA          | Sputum      |
| 38  | F      | MSSA         | Sputum      |
| 55  | F      | E Coli       | Blood/Urine |
| 73  | F      | Proteus      | Blood       |
| 82  | F      | Klebs        | Blood       |
| 79  | F      | E Coli       | Blood/Urine |
| 70  | F      | E Coli       | Chole/Urine |
| 71  | M      | Rhino        | DFA         |
| 48  | M      | Paraflu      | DFA         |
| 83  | F      | FLU          | DFA         |
| 78  | M      | FLU          | DFA         |
| 55  | F      | FLU          | DFA         |
| 54  | M      | FLU          | DFA         |
| 27  | M      | Rhino        | DFA         |
| 53  | M      | hMPV         | DFA         |
| 47  | F      | FLU/S Pneun  | DFA/U Ag    |
| 65  | F      | FLU/MRSA     | DFA/Sputum  |
| 53  | M      | hMPV/Klebs   | DFA/Sputum  |
| 63  | M      | Rhino/C Diff | DFA/Stool   |
| 68  | F      | Proteus/RSV  | Urine/DFA   |

### Supplemental Table 3. qPCR primer sequences, Related to Methods

| Gene          | Forward Primer                          | Reverse Primer                           |
|---------------|-----------------------------------------|------------------------------------------|
| <i>Gdf15</i>  | 5'- <del>TTCTGGCTGTTACGTTAAGC</del> -3' | 5'- <del>GCCATTTGCATCAATCAAGCA</del> -3' |
| <i>Cxcl1</i>  | 5'-ATCCAGAGCTTGAAGGTGTTGC-3'            | 5'-AAGGCAAGCCTCGCGACC-3'                 |
| <i>Tnf</i>    | 5'-TCTGTCTACTGAACTTCGGGGTG-3'           | 5'-ACTTGGTGGTTTGCTACGACG-3'              |
| <i>Mx1</i>    | 5'-TCCTCCCCAAATGTTTTTCAG-3'             | 5'-ACTGAGATGACCCAGCACCT-3'               |
| <i>IL12b</i>  | 5'-GGTGTAAACCAGAAAGGTGCG-3'             | 5'-AAGGTGTCATGATGAACTTAG-3'              |
| <i>16S</i>    | 5'-GTGCCAGCMGCCGCGGTAA-3'               | 5'-GGACTACHVGGGTWTCTAAT-3'               |
| <i>Gfral</i>  | Taqman Probe: Mm02344885_m1             |                                          |
| <i>Rpl13a</i> | Taqman Probe: Mm01612987_g1             |                                          |
